# Supplementary material for: The HOPS complex mediates autophagosome–lysosome fusion through interaction with syntaxin 17
Source: PubMed Central journal article supplement — Mol Biol Cell. 2014 Apr 15;25(8):1327–37. doi: 10.1091/mbc.E13-08-0447 (PMC3982997; doi:10.1091/mbc.e13-08-0447), 2014-04-15
Supplement: supp_E13-08-0447v1_CombinedSupMats.pdf [file supp_E13-08-0447v1_CombinedSupMats.pdf]

# Supplemental Materials

*Molecular Biology of the Cell*

Jiang et al.

**Supplemental Figure 1: VPS33A interacts with STX17 but not with STX18**

(A and B) HEK293T cells were transfected with indicated constructs. Three days later, cells were cultured in regular or starvation medium for 2 h, followed by immunoprecipitation using anti-FLAG antibody (M2 affinity gel). Input corresponds to 6% of the cell lysate used for each immunoprecipitation. The immunoprecipitates were then immunoblotted with anti-GFP, anti-Myc, and anti-FLAG antibodies.

**Supplemental Figure 2: Knockdown of VPS33A and VPS39 causes accumulation of STX17 and LC3 double-positive structures under starvation conditions.**

HeLa cells stably expressing GFP-STX17 were treated with siRNA against luciferase, VPS33A, VPS39, UVRAG, or VPS33A+UVRAG. Then, cells were cultured in starvation medium for 2 h and analyzed by immunofluorescence microscopy using anti-LC3 and anti-LAMP1 antibodies. Structures positive for STX17 and LC3 but not for LAMP1 are indicated by arrows. Scale bars: 10  $\mu$ m.

**Supplemental Figure 3: Knockdown of VPS33A reduces the amount of STX17-VAMP8 complex.**

HeLa cells were treated with siRNA oligonucleotides against luciferase or VPS33A. After 72 h, cells were starved for 2 h, followed by immunoprecipitation using anti-STX17 antibody. Input corresponds to 6% of the cell lysate used for each immunoprecipitation. The immunoprecipitates were then immunoblotted with the indicated antibodies.

# Supplemental Figure 1

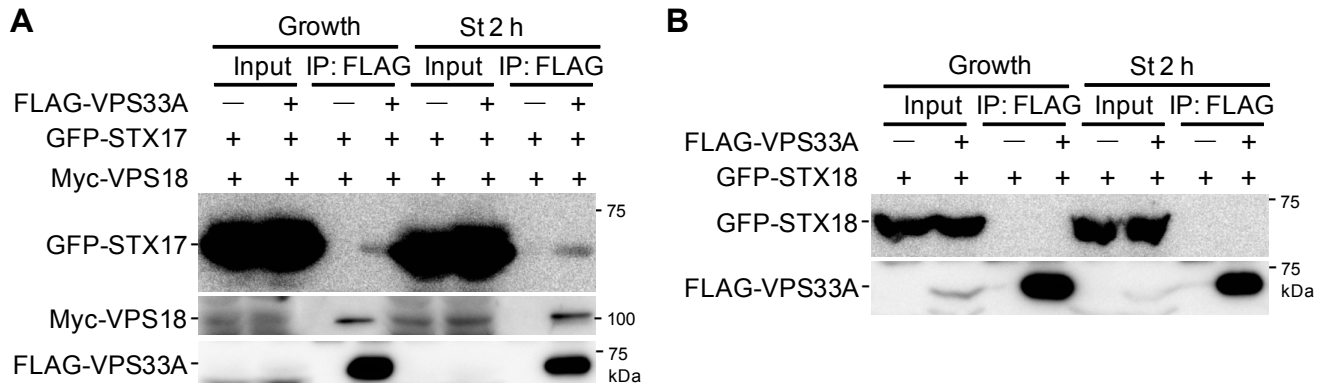

**Supplemental Figure 1: VPS33A interacts with STX17 but not with STX18** (A and B) HEK293T cells were transfected with indicated constructs. Three days later, cells were cultured in regular or starvation medium for 2 h, followed by immunoprecipitation using anti-FLAG antibody (M2 affinity gel). Input corresponds to 6% of the cell lysate used for each immunoprecipitation. The immunoprecipitates were then immunoblotted with anti-GFP, anti-Myc, and anti-FLAG antibodies.

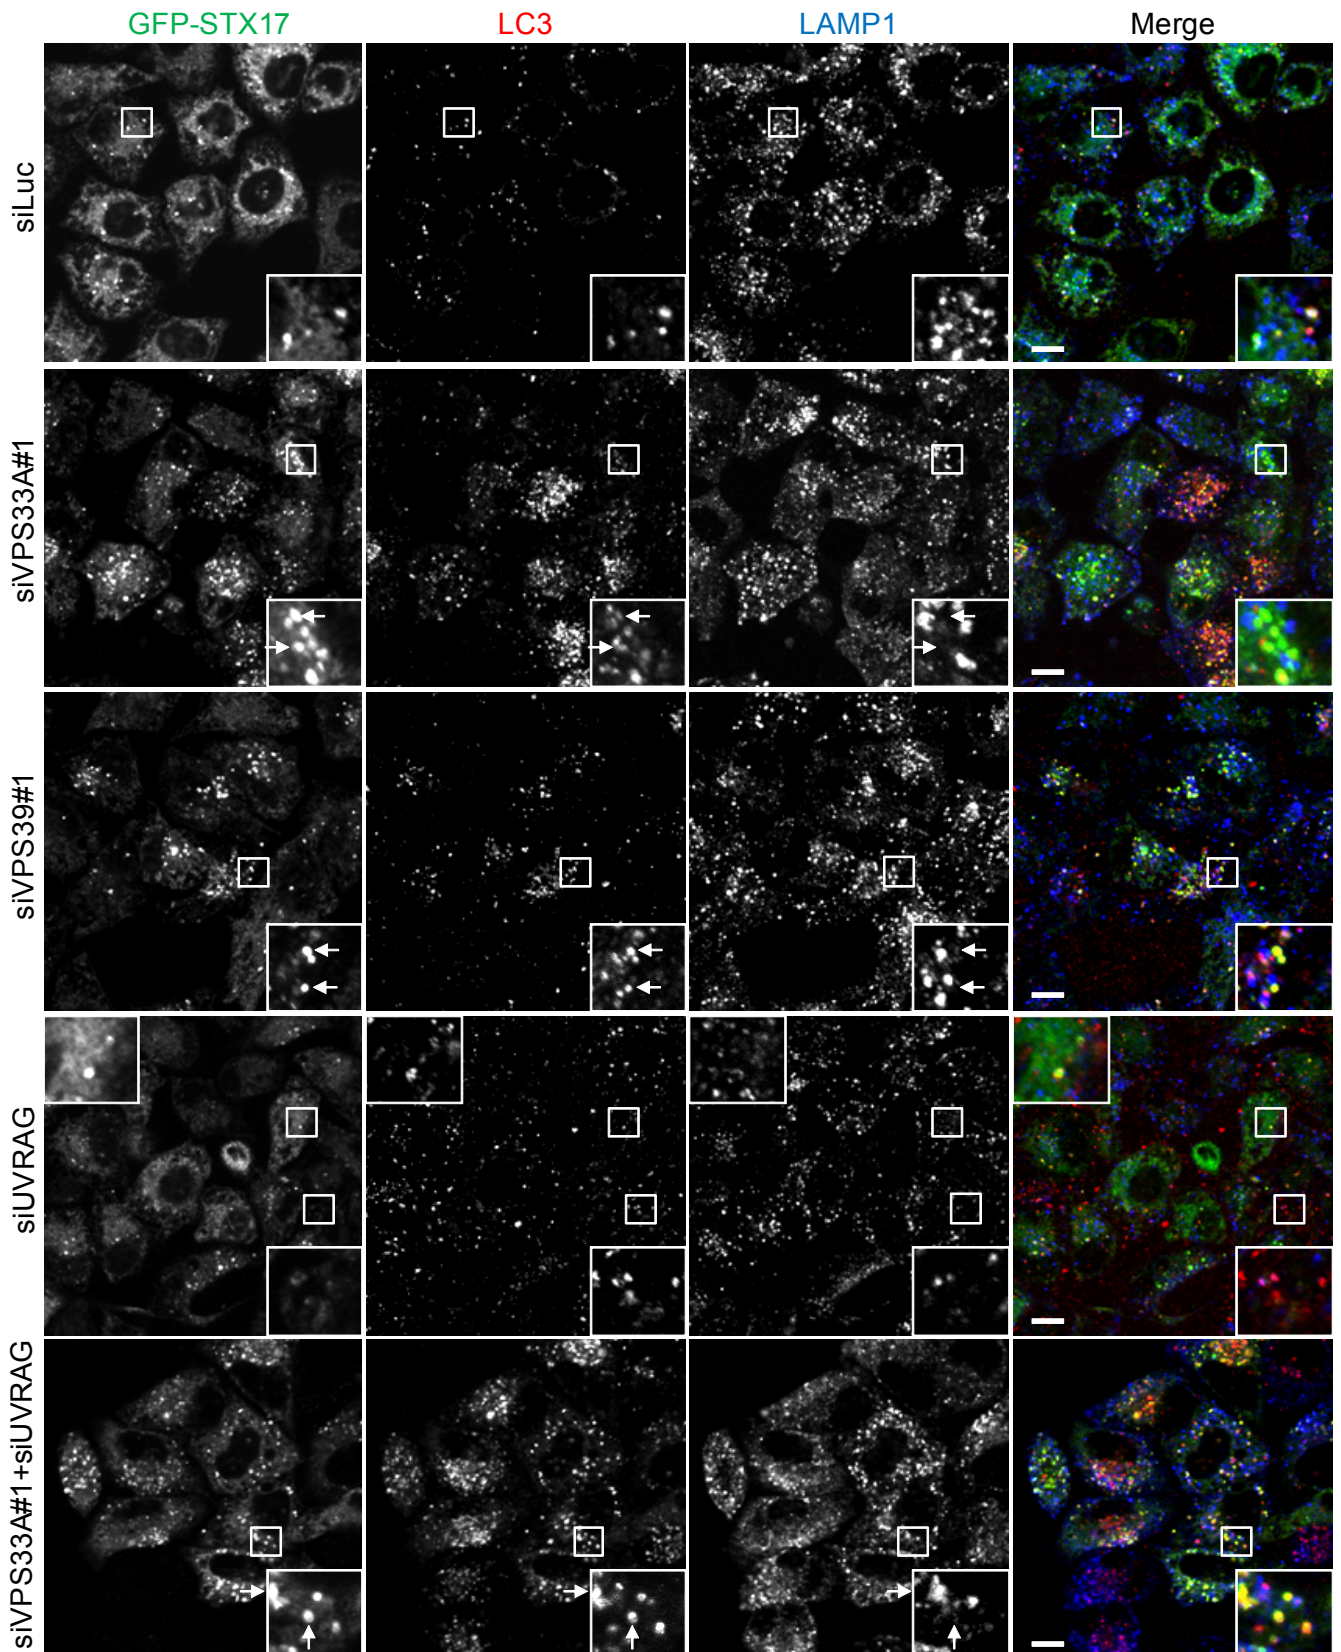

**Supplemental Figure 2: Knockdown of VPS33A and VPS39 causes accumulation of STX17 and LC3 double-positive structures under starvation conditions.** HeLa cells stably expressing GFP-STX17 were treated with siRNA against luciferase, VPS33A, VPS39, UVRAG, or VPS33A+UVRAG. Then, cells were cultured in starvation medium for 2 h and analyzed by immunofluorescence microscopy using anti-LC3 and anti-LAMP1 antibodies. Structures positive for STX17 and LC3 but not for LAMP1 are indicated by arrows. Scale bars: 10  $\mu$ m.

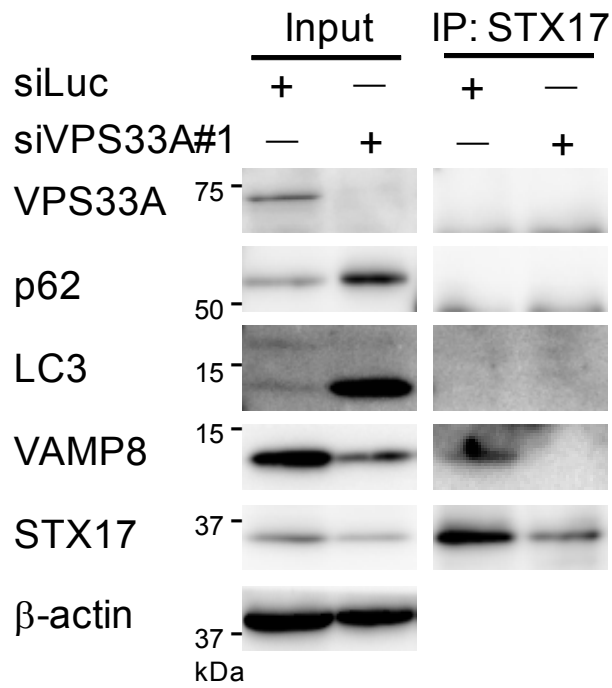

**Supplemental Figure 3: Knockdown of VPS33A reduces the amount of STX17-VAMP8 complex.** HeLa cells were treated with siRNA oligonucleotides against luciferase or VPS33A. After 72 h, cells were starved for 2 h, followed by immunoprecipitation using anti-STX17 antibody. Input corresponds to 6% of the cell lysate used for each immunoprecipitation. The immunoprecipitates were then immunoblotted with the indicated antibodies.
